# Supplementary material
Source: publisher site journal article supplement (https://www.dovepress.com/article/289014)
Supplement: Supplementary file 1 [file get_supplementary_file.php]

**Supplementary material 1:-National Cancer Institute Common Terminology  
Criteria for Adverse Events (CTCAE) Version 4.03: for safety/toxicity  
assessment**

| Adverse Event        | Grade                                                                                                             |                                                                                                         |                                                                                                                                                                           |                                                                        |       |
|----------------------|-------------------------------------------------------------------------------------------------------------------|---------------------------------------------------------------------------------------------------------|---------------------------------------------------------------------------------------------------------------------------------------------------------------------------|------------------------------------------------------------------------|-------|
|                      | 1                                                                                                                 | 2                                                                                                       | 3                                                                                                                                                                         | 4                                                                      | 5     |
| Constipation         | Occasional or intermittent symptoms; occasional use of stool softeners, laxatives, dietary modification, or enema | Persistent symptoms with regular use of laxatives or enemas; limiting instrumental ADL                  | Obstipation with manual evacuation indicated; limiting self-care ADL                                                                                                      | Life-threatening consequences; urgent intervention indicated           | Death |
| Diarrhea             | Increase of <4 stools per day over baseline; mild increase in ostomy output compared to baseline                  | Increase of 4 - 6 stools per day over baseline; moderate increase in ostomy output compared to baseline | Increase of $\geq 7$ stools per day over baseline; incontinence; hospitalization indicated; severe increase in ostomy output compared to baseline; limiting self-care ADL | Life-threatening consequences; urgent intervention indicated           | Death |
| Gastritis/stomatitis | Asymptomatic; clinical or diagnostic observations only; intervention not indicated                                | Symptomatic; altered GI function; medical intervention indicated                                        | Severely altered eating or gastric function; TPN or hospitalization indicated                                                                                             | Life-threatening consequences; urgent operative intervention indicated | Death |
| Dysgeusia            | Altered taste but no change in diet                                                                               | Altered taste with change in diet (e.g., oral supplements); noxious or unpleasant taste; loss of taste  | –                                                                                                                                                                         | –                                                                      | –     |
| Oral Mucositis       | Asymptomatic or mild symptoms; intervention not indicated                                                         | Moderate pain; not interfering with oral intake; modified diet indicated                                | Severe pain; interfering with oral intake                                                                                                                                 | Life-threatening consequences; urgent intervention indicated           | Death |

**Supplementary material 1:-National Cancer Institute Common Terminology  
Criteria for Adverse Events (CTCAE) Version 4.03: for safety/toxicity  
assessment**

|                |                                                           |                                                                                    |                                                                                          |                                                              |       |
|----------------|-----------------------------------------------------------|------------------------------------------------------------------------------------|------------------------------------------------------------------------------------------|--------------------------------------------------------------|-------|
| Anal mucositis | Asymptomatic or mild symptoms; intervention not indicated | Symptomatic; medical intervention indicated; limiting instrumental ADL             | Severe symptoms; limiting self care ADL                                                  | Life-threatening consequences; urgent intervention indicated | Death |
| Nausea         | Loss of appetite without alteration in eating habits      | Oral intake decreased without significant weight loss, dehydration or malnutrition | Inadequate oral caloric or fluid intake; tube feeding, TPN, or hospitalization indicated |                                                              |       |

|                        |                                                                                                     |                                                                                                                                                                                        |                                                                                                                                                                                                                                                                 |                                                              |       |
|------------------------|-----------------------------------------------------------------------------------------------------|----------------------------------------------------------------------------------------------------------------------------------------------------------------------------------------|-----------------------------------------------------------------------------------------------------------------------------------------------------------------------------------------------------------------------------------------------------------------|--------------------------------------------------------------|-------|
| Vomiting               | 1 - 2 episodes (separated by 5 minutes) in 24 hrs                                                   | 3 - 5 episodes (separated by 5 minutes) in 24 hrs                                                                                                                                      | >=6 episodes (separated by 5 minutes) in 24 hrs; tube feeding, TPN or hospitalization indicated                                                                                                                                                                 | Life-threatening consequences; urgent intervention indicated | Death |
| Skin hyperpigmentation | Hyperpigmentation covering <10% BSA; no psychosocial impact                                         | Hyperpigmentation covering >10% BSA; associated psychosocial impact                                                                                                                    | –                                                                                                                                                                                                                                                               | –                                                            | –     |
| Allergic reaction      | Transient flushing or rash, drug fever <38 degrees C (<100.4 degrees F); intervention not indicated | Intervention or infusion interruption indicated; responds promptly to symptomatic treatment (e.g., antihistamines, NSAIDS, narcotics); prophylactic medications indicated for <=24 hrs | Prolonged (e.g., not rapidly responsive to symptomatic medication and/or brief interruption of infusion); recurrence of symptoms following initial improvement; hospitalization indicated for clinical sequelae (e.g., renal impairment, pulmonary infiltrates) | Life-threatening consequences; urgent intervention indicated | Death |

**Supplementary material 1:-National Cancer Institute Common Terminology  
Criteria for Adverse Events (CTCAE) Version 4.03: for safety/toxicity  
assessment**

|                               |                                                                                    |                                                                                                                  |                                                                                                              |                                                              |       |
|-------------------------------|------------------------------------------------------------------------------------|------------------------------------------------------------------------------------------------------------------|--------------------------------------------------------------------------------------------------------------|--------------------------------------------------------------|-------|
|                               | camouflage                                                                         | impact                                                                                                           |                                                                                                              |                                                              |       |
| Fatigue                       | Fatigue relieved by rest                                                           | Fatigue not relieved by rest; limiting instrumental ADL                                                          | Fatigue not relieved by rest, limiting self care ADL                                                         | –                                                            | –     |
| Peripheral motor neuropathy   | Asymptomatic; clinical or diagnostic observations only; intervention not indicated | Moderate symptoms; limiting instrumental ADL                                                                     | Severe symptoms; limiting self care ADL; assistive device indicated                                          | Life-threatening consequences; urgent intervention indicated | Death |
| Peripheral sensory neuropathy | Asymptomatic; loss of deep tendon reflexes or paresthesia                          | Moderate symptoms; limiting instrumental ADL                                                                     | Severe symptoms; limiting self care ADL                                                                      | Life-threatening consequences; urgent intervention indicated | Death |
| Paresthesia                   | Mild symptoms                                                                      | Moderate symptoms; limiting instrumental ADL                                                                     | Severe symptoms; limiting self care ADL                                                                      | –                                                            | –     |
| Epistaxis                     | Mild symptoms; intervention not indicated                                          | Moderate symptoms; medical intervention indicated (e.g., nasal packing, cauterization; topical vasoconstrictors) | Transfusion, radiologic, endoscopic, or operative intervention indicated (e.g., hemostasis of bleeding site) | Life-threatening consequences; urgent intervention indicated | Death |

**Supplementary material 1:-National Cancer Institute Common Terminology  
Criteria for Adverse Events (CTCAE) Version 4.03: for safety/toxicity  
assessment**

|                                      |                                                                                                                                                                         |                                                                                                                                                                                                                                                                            |                                                                                                                                             |                                                                                                                                                                  |       |
|--------------------------------------|-------------------------------------------------------------------------------------------------------------------------------------------------------------------------|----------------------------------------------------------------------------------------------------------------------------------------------------------------------------------------------------------------------------------------------------------------------------|---------------------------------------------------------------------------------------------------------------------------------------------|------------------------------------------------------------------------------------------------------------------------------------------------------------------|-------|
| Edema limbs                          | 5 - 10% inter-limb discrepancy in volume or circumference at point of greatest visible difference; swelling or obscuration of anatomic architecture on close inspection | >10 - 30% inter-limb discrepancy in volume or circumference at point of greatest visible difference; readily apparent obscuration of anatomic architecture; obliteration of skin folds; readily apparent deviation from normal anatomic contour; limiting instrumental ADL | >30% inter-limb discrepancy in volume; gross deviation from normal anatomic contour; limiting self-care ADL                                 |                                                                                                                                                                  |       |
| Thromboembolic event                 | Venous thrombosis (e.g., superficial thrombosis)                                                                                                                        | Venous thrombosis (e.g., uncomplicated deep vein thrombosis), medical intervention indicated                                                                                                                                                                               | Thrombosis (e.g., uncomplicated pulmonary embolism [venous], non-embolic cardiac mural [arterial] thrombus), medical intervention indicated | Life-threatening (e.g., pulmonary embolism, cerebrovascular event, arterial insufficiency); hemodynamic or neurologic instability; urgent intervention indicated | Death |
| Alanine aminotransferase increased   | >ULN - 3.0 x ULN                                                                                                                                                        | >3.0 - 5.0 x ULN                                                                                                                                                                                                                                                           | >5.0 - 20.0 x ULN                                                                                                                           | >20.0 x ULN                                                                                                                                                      | -     |
| Aspartate aminotransferase increased | >ULN - 3.0 x ULN                                                                                                                                                        | >3.0 - 5.0 x ULN                                                                                                                                                                                                                                                           | >5.0 - 20.0 x ULN                                                                                                                           | >20.0 x ULN                                                                                                                                                      | -     |
| Creatinine increased                 | >1 - 1.5 x baseline;<br>>ULN - 1.5 x ULN                                                                                                                                | >1.5 - 3.0 x baseline;<br>>1.5 - 3.0 x ULN                                                                                                                                                                                                                                 | >3.0 baseline; >3.0 - 6.0 x ULN                                                                                                             | >6.0 x ULN                                                                                                                                                       | -     |
| Alkaline phosphatase increased       | >ULN - 2.5x ULN                                                                                                                                                         | >2.5 - 5.0 x ULN                                                                                                                                                                                                                                                           | >5.0 - 20.0 x ULN                                                                                                                           | >20.0 x ULN                                                                                                                                                      | -     |
| Lymphocyte count decreased           | <LLN - 800/mm <sup>3</sup>                                                                                                                                              | <800 - 500/mm <sup>3</sup>                                                                                                                                                                                                                                                 | <500 - 200/mm <sup>3</sup>                                                                                                                  | <200/mm <sup>3</sup>                                                                                                                                             | -     |

**Supplementary material 1:-National Cancer Institute Common Terminology  
Criteria for Adverse Events (CTCAE) Version 4.03: for safety/toxicity  
assessment**

|                                            |                                                                                            |                                                                                                                 |                                                                                                                                                                               |                                                              |       |
|--------------------------------------------|--------------------------------------------------------------------------------------------|-----------------------------------------------------------------------------------------------------------------|-------------------------------------------------------------------------------------------------------------------------------------------------------------------------------|--------------------------------------------------------------|-------|
| Neutrophil count decreased                 | <LLN - 1500/mm <sup>3</sup>                                                                | <1500 - 1000/mm <sup>3</sup>                                                                                    | <1000 - 500/mm <sup>3</sup>                                                                                                                                                   | <500/mm <sup>3</sup>                                         | -     |
| Platelet count decreased                   | <LLN - 75,000/mm <sup>3</sup>                                                              | <75,000 - 50,000/mm <sup>3</sup>                                                                                | <50,000 - 25,000/mm <sup>3</sup>                                                                                                                                              | <25,000/mm <sup>3</sup>                                      | -     |
| White blood cell decreased                 | <LLN - 3000/mm <sup>3</sup>                                                                | <3000 - 2000/mm <sup>3</sup>                                                                                    | <2000 - 1000/mm <sup>3</sup>                                                                                                                                                  | <1000/mm <sup>3</sup>                                        | -     |
| Anemia                                     | Hemoglobin (Hgb) <LLN - 10.0 g/dL; <LLN - 6.2 mmol/L; <LLN - 100 g/L                       | Hgb <10.0 - 8.0 g/dL; <6.2 - 4.9 mmol/L; <100 - 80g/L                                                           | Hgb <8.0 g/dL; <4.9 mmol/L; <80 g/L; transfusion indicated                                                                                                                    | Life-threatening consequences; urgent intervention indicated | Death |
| Febrile neutropenia                        | -                                                                                          | -                                                                                                               | ANC <1000/mm <sup>3</sup> with a single temperature of >38.3 degrees C (101 degrees F) or a sustained temperature of >=38 degrees C (100.4 degrees F) for more than one hour. | Life-threatening consequences; urgent intervention indicated | Death |
| Hypotension                                | Asymptomatic, intervention not indicated                                                   | Non-urgent medical intervention indicated                                                                       | Medical intervention or hospitalization indicated                                                                                                                             | Life-threatening and urgent intervention indicated           | Death |
| Palmar-plantar erythrodysesthesia syndrome | Minimal skin changes or dermatitis (e.g., erythema, edema, or hyperkeratosis) without pain | Skin changes (e.g., peeling, blisters, bleeding, edema, or hyperkeratosis) with pain; limiting instrumental ADL | Severe skin changes (e.g., peeling, blisters, bleeding, edema, or hyperkeratosis) with pain; limiting self care ADL                                                           | -                                                            | -     |
| Nail discoloration                         | Asymptomatic; clinical or diagnostic observations only; intervention not indicated         | -                                                                                                               | -                                                                                                                                                                             | -                                                            | -     |

**Supplementary material 1:-National Cancer Institute Common Terminology  
Criteria for Adverse Events (CTCAE) Version 4.03: for safety/toxicity  
assessment**

|                |   |                                                                                          |                                                                                                                             |                                                              |       |
|----------------|---|------------------------------------------------------------------------------------------|-----------------------------------------------------------------------------------------------------------------------------|--------------------------------------------------------------|-------|
| Lung infection | – | Moderate symptoms; oral intervention indicated (e.g., antibiotic, antifungal, antiviral) | IV antibiotic, antifungal, or antiviral intervention indicated; radiologic, endoscopic, or operative intervention indicated | Life-threatening consequences; urgent intervention indicated | Death |
| Meningitis     | – | –                                                                                        | IV antibiotic, antifungal, or antiviral intervention indicated; radiologic or operative                                     | Life-threatening consequences; urgent intervention indicated | Death |

|                                   |                                         |                                                                                              |                                                                                                                |                                                              |       |
|-----------------------------------|-----------------------------------------|----------------------------------------------------------------------------------------------|----------------------------------------------------------------------------------------------------------------|--------------------------------------------------------------|-------|
|                                   |                                         |                                                                                              | intervention indicated; focal neurologic deficit                                                               |                                                              |       |
| Skin infection                    | Localized, local intervention indicated | Oral intervention indicated (e.g., antibiotic, antifungal, antiviral)                        | IV antibiotic, antifungal, or antiviral intervention indicated; radiologic or operative intervention indicated | Life-threatening consequences; urgent intervention indicated | Death |
| Mucosal infection                 | Localized, local intervention indicated | Oral intervention indicated (e.g., antibiotic, antifungal, antiviral)                        | IV antibiotic, antifungal, or antiviral intervention indicated; radiologic or operative intervention indicated | Life-threatening consequences; urgent intervention indicated | Death |
| Upper gastrointestinal hemorrhage | Mild; intervention not indicated        | Moderate symptoms; medical intervention or minor cauterization indicated                     | Transfusion, radiologic, endoscopic, or elective operative intervention indicated                              | Life-threatening consequences; urgent intervention indicated | Death |
| Soft tissue infection             | –                                       | Localized; local intervention indicated (e.g., topical antibiotic, antifungal, or antiviral) | IV antibiotic, antifungal, or antiviral intervention indicated; radiologic or operative intervention indicated | Life-threatening consequences; urgent intervention indicated | Death |

**Supplementary material 1:-National Cancer Institute Common Terminology  
Criteria for Adverse Events (CTCAE) Version 4.03: for safety/toxicity  
assessment**

|                             |                                                                                      |                                                                                                                                                    |                                                                                                                             |                                                              |       |
|-----------------------------|--------------------------------------------------------------------------------------|----------------------------------------------------------------------------------------------------------------------------------------------------|-----------------------------------------------------------------------------------------------------------------------------|--------------------------------------------------------------|-------|
| Upper respiratory infection | –                                                                                    | Moderate symptoms; oral intervention indicated (e.g., antibiotic, antifungal, antiviral)                                                           | IV antibiotic, antifungal, or antiviral intervention indicated; radiologic, endoscopic, or operative intervention indicated | Life-threatening consequences; urgent intervention indicated | Death |
| Tooth infection             | –                                                                                    | Localized; local intervention indicated (e.g., topical antibiotic, antifungal, or antiviral)                                                       | IV antibiotic, antifungal, or antiviral intervention indicated; radiologic or operative intervention indicated              | Life-threatening consequences; urgent intervention indicated | Death |
| Urinary tract infection     | –                                                                                    | Localized; local intervention indicated (e.g., topical antibiotic, antifungal, or antiviral)                                                       | IV antibiotic, antifungal, or antiviral intervention indicated; radiologic or operative intervention indicated              | Life-threatening consequences; urgent intervention indicated | Death |
| Dry mouth                   | Symptomatic (e.g., dry or thick                                                      | Moderate symptoms; oral                                                                                                                            | Inability to adequately                                                                                                     | –                                                            | –     |
|                             | saliva) without significant dietary alteration; unstimulated saliva flow >0.2 ml/min | intake alterations (e.g., copious water, other lubricants, diet limited to purees and/or soft, moist foods); unstimulated saliva 0.1 to 0.2 ml/min | orally; tube feeding or TPN indicated; unstimulated saliva <0.1 ml/min                                                      |                                                              |       |
| Myalgia                     | Mild pain                                                                            | Moderate pain; limiting instrumental ADL                                                                                                           | Severe pain; limiting self care ADL                                                                                         | –                                                            | –     |
| Arthralgia                  | Mild pain                                                                            | Moderate pain; limiting instrumental ADL                                                                                                           | Severe pain; limiting self care ADL                                                                                         | –                                                            | –     |

ADL=activities of daily living; ANC=absolute neutrophil count; LLN=lower limit of normal; ULN=upper limit of normal; TPN = Total Parenteral Nutrition.

**Supplementary material 2 (For table 4): Clinical characteristics and socio-demographic variables entered into stepwise linear regression to determine their effects on QoL.**

Variables entered into the model were age (continuous variable), Body Mass Index (continuous variable), Body Surface Area (continuous variable), all baseline laboratory values (continuous variable) such as baseline Aspartate/Alanine aminotransferase (AST/ALT), Alkaline Phosphatase (ALP), Serum Creatinine (SCr), Hemoglobin (Hgb), White Blood Cell counts (WBC), Absolute Neutrophil Count (ANC) and lymphocyte counts, chemotherapy cycles (cycle 4/6 reference category vs cycle 8), tumor stage (stage 1/2 reference category vs 3/4), comorbidity (Yes vs No reference category), marital status ((having spouse(Yes) vs No spouse reference category)), educational status (illiterate reference category vs literate), having children (Yes vs No reference category), regimen (AC reference category vs AC-T) and came from (from/around capital city reference category vs from distant).

**Supplementary material 3 (For table 5): Variables entered into stepwise linear regression model to determine the effect of chemotherapy toxicities on each dimension of QoL.**

Variables entered in to the model were dysgeusia (Grade 0/1 reference category vs Grade 2), (Grade 0/1 reference category vs Grade  $\geq 2$ ), diarrhea (Grade 0/1 reference category vs Grade  $\geq 2$ ), gastritis (Grade 0/1 reference category vs Grade  $\geq 2$ ), oral mucositis (Grade 0/1 reference category vs Grade  $\geq 2$ ), nausea (Grade 0/1 reference category vs Grade  $\geq 2$ ), vomiting (Grade 0/1 reference category vs Grade  $\geq 2$ ), fatigue (Grade 0/1 reference category vs Grade  $\geq 2$ ), arthralgia/myalgia (Grade 0/1 reference category vs Grade  $\geq 2$ ), peripheral neuropathy (Grade 0/1 reference category vs Grade  $\geq 2$ ), dry mouth (Grade 0/1 reference category vs Grade  $\geq 2$ ), leukopenia (Grade 0/1 reference category vs Grade  $\geq 2$ ), neutropenia (Grade 0/1 reference category vs Grade  $\geq 2$ ), anemia (Grade 0/1 reference category vs Grade  $\geq 2$ ), lymphopenia (Grade 0/1 reference category vs Grade  $\geq 2$ ), serum creatinine elevation (Grade 0 reference category vs Grade  $\geq 1$ ), alkaline phosphatase elevation (Grade 0 reference category vs Grade  $\geq 1$ ), alanine/aspartate transferase elevation (Grade 0 reference category vs Grade  $\geq 1$ ), baseline quality of life score, significant corresponding socio-demographic and clinical data.
